# Supplementary material
Source: Springer Nature journal article supplement (https://www.springermedizin.de/resource/supplementary/12907_2012_118_MOESM4_ESM.pdf/9524704)

# EBER

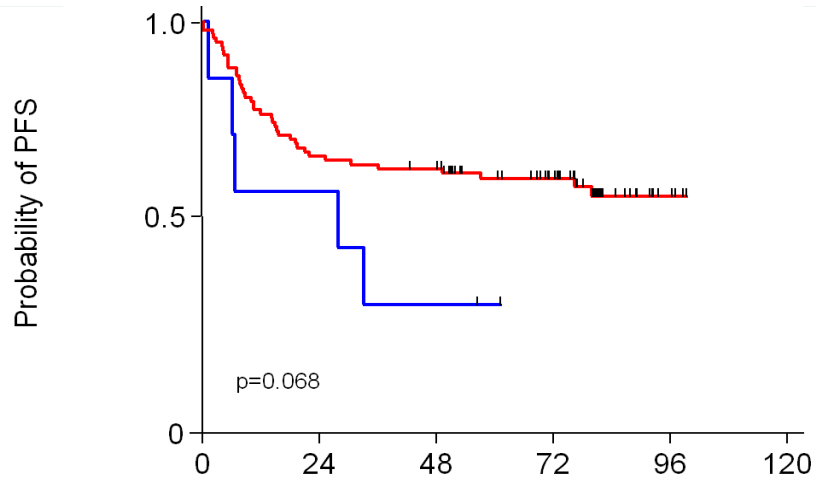

Patients at risk  
 Negative 7      4      2      0      0      0  
 Positive 94     62     58     37     4      0

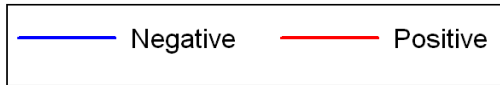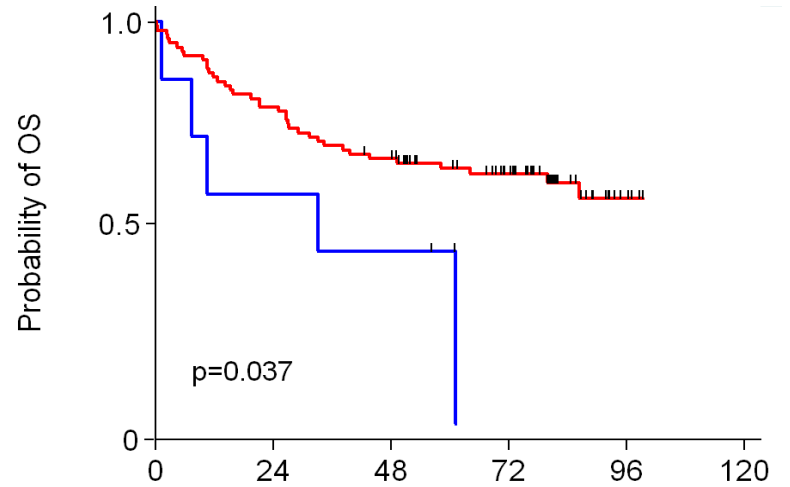

Patients at risk  
 Negative 7      4      3      0      0      0  
 Positive 94     74     61     39     4      0

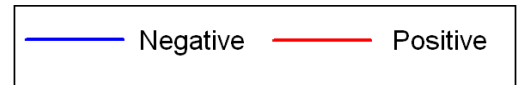

# p63

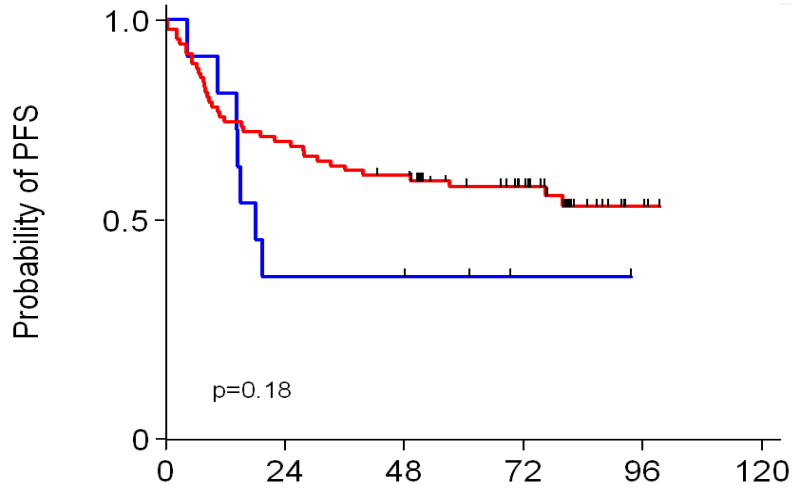

Patients at risk

|          | 0  | 24 | 48 | 72 | 96 | 120 |
|----------|----|----|----|----|----|-----|
| Negative | 11 | 4  | 4  | 1  | 0  | 0   |
| Positive | 83 | 58 | 50 | 32 | 3  | 0   |

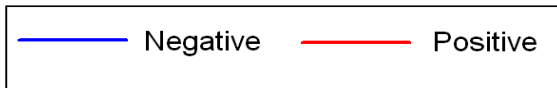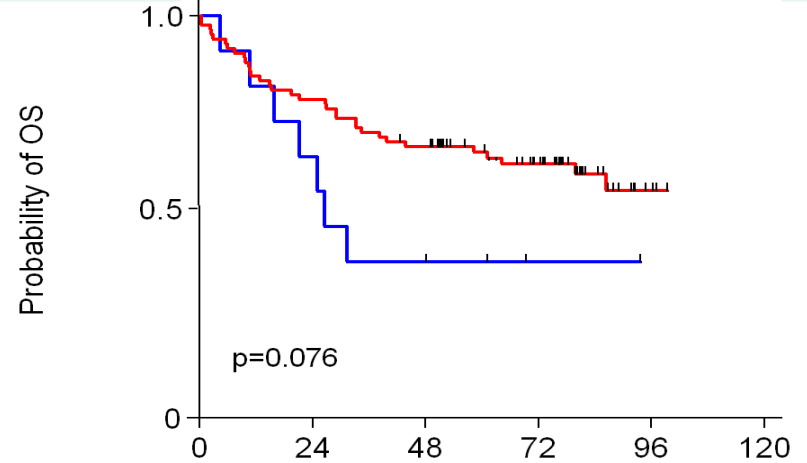

Patients at risk

|          | 0  | 24 | 48 | 72 | 96 | 120 |
|----------|----|----|----|----|----|-----|
| Negative | 11 | 7  | 4  | 1  | 0  | 0   |
| Positive | 83 | 65 | 54 | 34 | 3  | 0   |

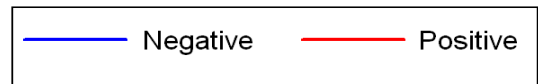

# mTOR

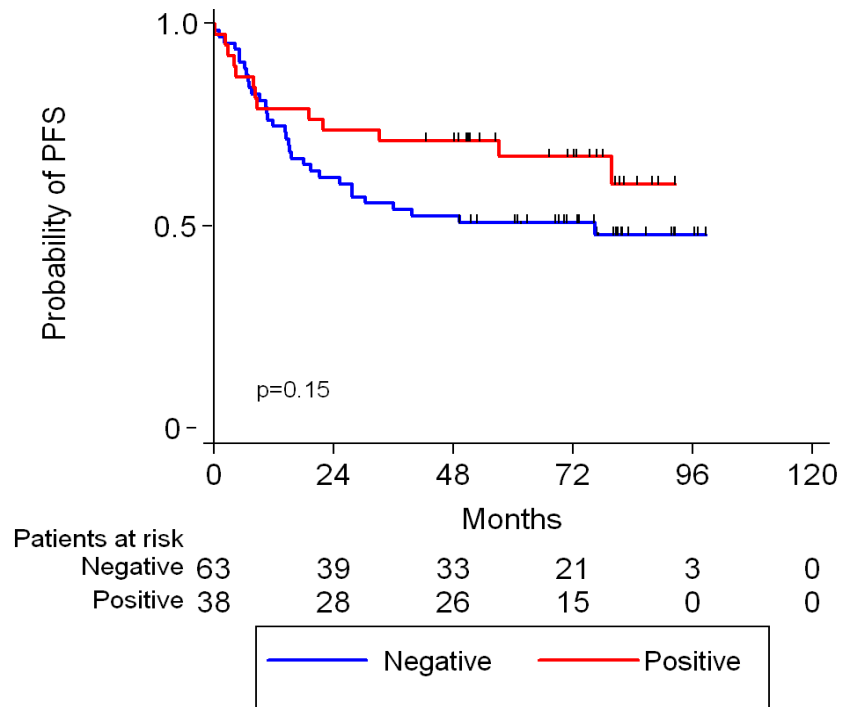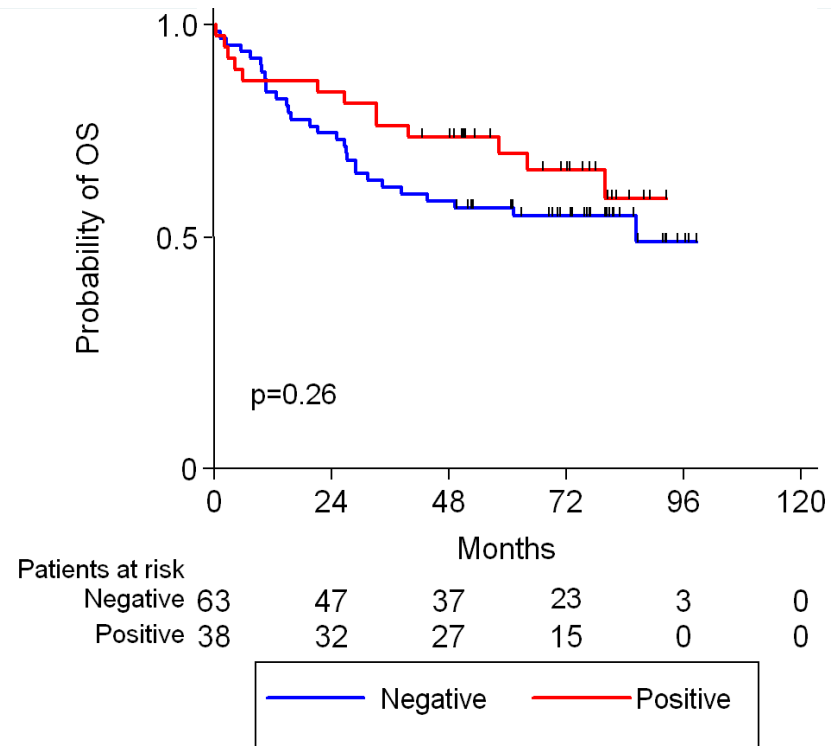

# ERCC1

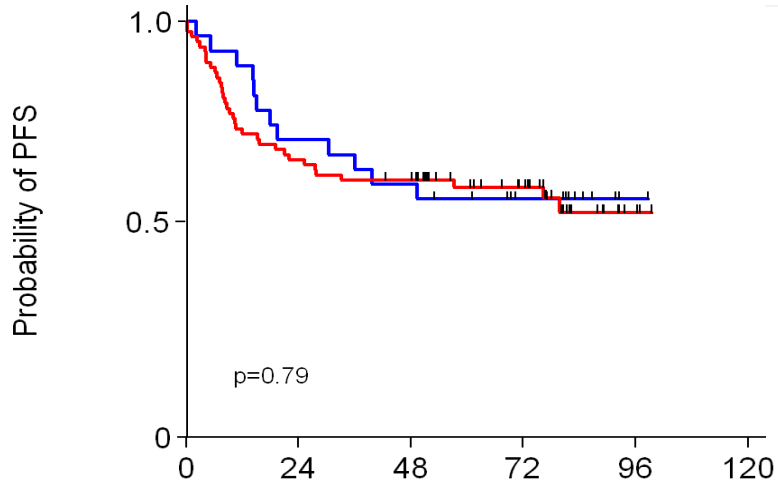

Patients at risk

|          | 0  | 24 | 48 | 72 | 96 | 120 |
|----------|----|----|----|----|----|-----|
| Negative | 27 | 19 | 16 | 10 | 1  | 0   |
| Positive | 78 | 51 | 46 | 28 | 3  | 0   |

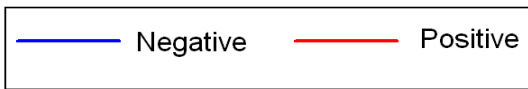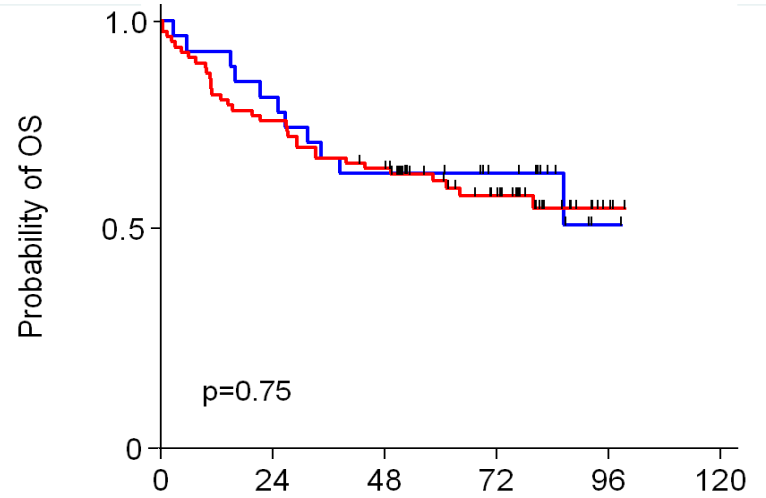

Patients at risk

|          | 0  | 24 | 48 | 72 | 96 | 120 |
|----------|----|----|----|----|----|-----|
| Negative | 27 | 22 | 17 | 11 | 1  | 0   |
| Positive | 78 | 59 | 49 | 29 | 3  | 0   |

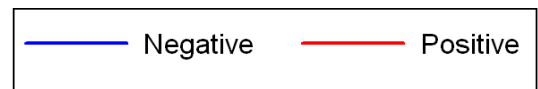

# Cyclin D1

all patients, irrespective of treatment Groups

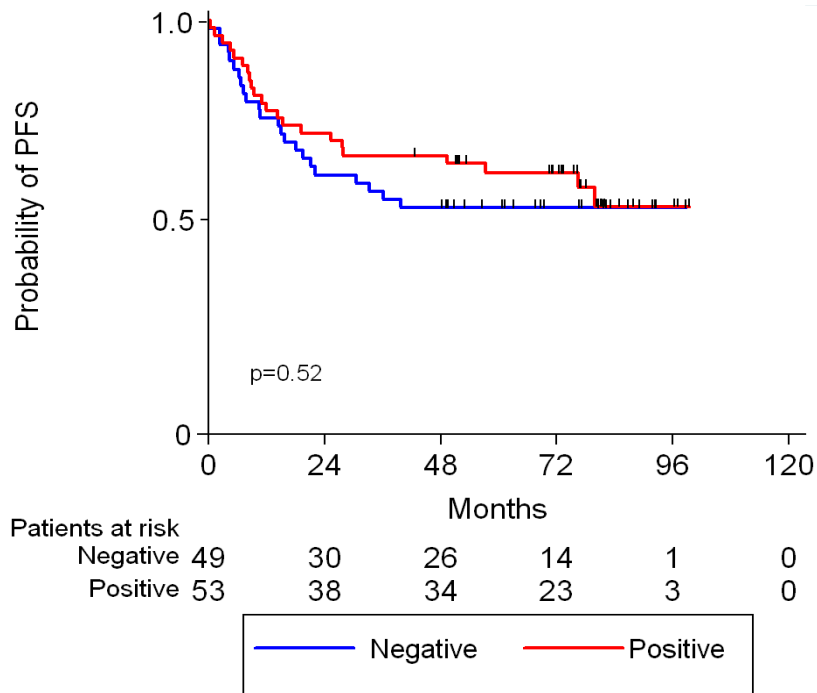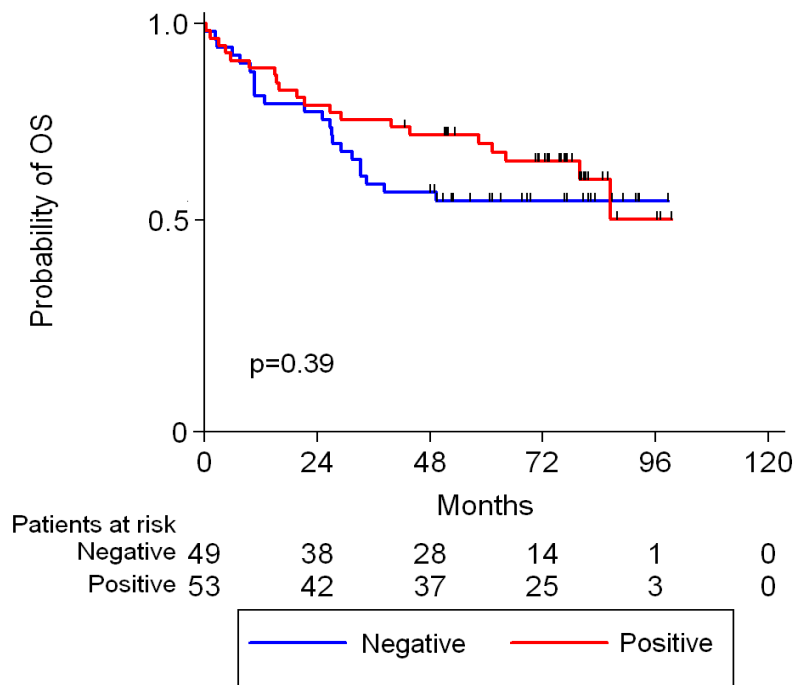

Supplement: MOESM4 [file 9524704]
